# Supplementary material for: HOPS catalyzes the interdependent assembly of each vacuolar SNARE into a SNARE complex
Source: PubMed Central journal article supplement — Mol Biol Cell. 2017 Apr 1;28(7):975–83. doi: 10.1091/mbc.E16-10-0743 (PMC5385945; doi:10.1091/mbc.e16-10-0743), 2017-04-01
Supplement: supp_E16-10-0743v1_CombinedSupMats.pdf [file supp_E16-10-0743v1_CombinedSupMats.pdf]

# Supplemental Materials

*Molecular Biology of the Cell*

Orr et al.

**ORR et al 2017 - SUPPLEMENTAL MATERIALS**

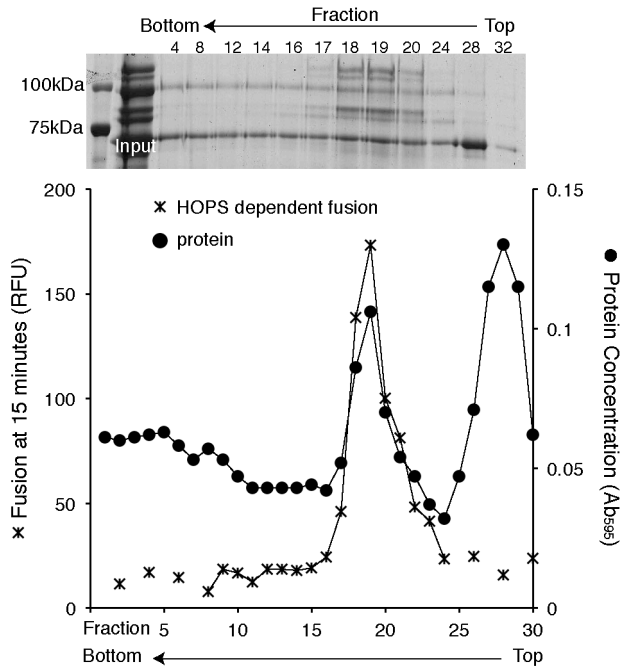

**SUPPLEMENTAL FIGURE S1:** Velocity gradient purification of HOPS. Affinity-isolated HOPS was gradient purified as described in Materials and Methods. Aliquots of select fractions from the sedimentation gradient were boiled in Sample Buffer and analyzed for HOPS subunits by SDS-PAGE. Fractions 2 through 30 were analyzed for protein concentration by Bradford (closed circles) and for fusion activity via luminal compartment mixing (stars). RPLs of vacuolar mimic lipid composition, bearing Ypt7 and either 1R or 3Q and containing either biotinylated R-phycoerythrin or Cy5 labeled streptavidin in their lumens were prepared as described (Zick *et al.*, 2014) with a 1:2000 protein to lipid ratio of Ypt7, and a 1:2600 protein to lipid ratio of each of the 4 SNAREs. Fusion was assayed in Rb150 as described (Zick *et al.*, 2014), with each fusion reaction containing 1mM lipid, 14.5 $\mu$ M external streptavidin, 28.8 $\mu$ M GTP, 3mM EDTA, 1.5mM ATP, 1.6mM MgCl<sub>2</sub>, 177nM Sec17, 1.3 $\mu$ M Sec18 and 2 $\mu$ l of each fraction from the HOPS gradient, in a total of 10 $\mu$ l. RFUs (Raw Fluorescence Units) at t=15min are shown here.

**SUPPLEMENTAL TABLE S1:** Kinetics of the association of SNAREs and HOPS with GST-tagged Qc. Immunobot images from Figure 6 were analyzed using UN-SCAN-IT Software (Silk Scientific, Orem, UT). Data represents the average of 3 independent experiments.

|       |       | complete |       |       | 30 min time points for controls |         |        |        |         |
|-------|-------|----------|-------|-------|---------------------------------|---------|--------|--------|---------|
|       |       | 5min     | 30min | 90min | detergent                       | no HOPS | no sQa | no sQb | w.t. Qc |
| pMols | Vps16 | 0.06     | 0.08  | 0.10  | 0.04                            | 0.02    | 0.07   | 0.06   | 0.02    |
|       | R     | 0.53     | 0.82  | 0.85  | 0.08                            | 0.11    | 0.07   | 0.07   | 0.08    |
|       | sQa   | 0.38     | 0.56  | 0.52  | 0.05                            | 0.14    | 0.03   | 0.11   | 0.04    |
|       | sQb   | 0.25     | 0.48  | 0.57  | 0.02                            | 0.07    | 0.01   | 0.01   | 0.05    |

## REFERENCES

Zick M, Wickner W (2014). A distinct tethering step is vital for vacuole membrane fusion. *Elife* 3, e03251.
